# Supplementary material
Source: ML conference proceedings conference paper supplement (https://openaccess.thecvf.com/content/CVPR2026/html/Yang_MedLoc-R1_Performance-Aware_Curriculum_CVPR_2026_paper.html)
Supplement: Supplementary file 1 [file Yang_MedLoc-R1_Performance-Aware_Curriculum_CVPR_2026_supplemental.pdf]

# MedLoc-R1: Performance-Aware Curriculum Reward Scheduling for GRPO-Based Medical Visual Grounding

## Supplementary Material

### A. Datasets Details

We provide detailed statistics of the dataset splits for the three benchmarks used in our experiments: **HAM10000**, **HEEL**, and **TN3K**.

- **HAM10000** is a public dataset containing 10,015 dermoscopic images released in 2018 by the Medical University of Vienna. It is one of the most important benchmark datasets in the field of automatic skin cancer detection and classification. It covers 7 common skin lesion types: actinic keratoses (akiec), basal cell carcinoma (bcc), benign keratosis-like lesions (bkl), dermatofibroma (df), melanoma (mel), melanocytic nevi (nv), and vascular lesions (vasc). We derived bounding boxes from the provided lesion masks and randomly split them into training and test sets with 8,012 training and 2,003 testing samples across 7 skin lesion categories.
- **HEEL** is a public dataset of 3,956 lateral foot X-ray images collected at Kirkuk General Hospital, comprising three diagnostic categories: Normal (1,842 images), Heel Spur (1,316 images), and Sever’s disease (798 images). All images are labeled by orthopedic specialists and cross-validated by radiologists. Following the original protocol, we use 3,164 images for training and 792 for testing, while preserving the class distribution across the three categories.
- **TN3K** is an open-access thyroid nodule ultrasound dataset comprising 3,493 B-mode images from 2,421 patients, each annotated with pixel-wise nodule masks. The official split contains 2,879 training and 614 test images. In our experiments, we derive a binary classification subset with 2,655 training and 544 testing samples, labeled as `malignant` and `benign` cases.

To offer a clearer overview of their composition, Table 5 summarizes the class-wise training and testing splits for all three datasets.

### B. Experimental Configuration Details

We elaborate here on the configuration details of the threshold scheduling strategies evaluated in Table 3. All strategies manipulate three key scheduling parameters: the step size  $\delta_k$ , the performance percentile  $P_k$ , and the stability margin  $S_k$ . These parameters govern how the threshold  $\tau_k$  is updated during training.

**Adaptive (Ours).** The adaptive strategy **dynamically** adjusts  $\delta_k$ ,  $P_k$ , and  $S_k$  according to the current threshold value

Table 5. Class-wise number of training and test samples for the three benchmarks.

| Dataset  | Class        | Train | Test |
|----------|--------------|-------|------|
| HAM10000 | nv           | 5367  | 1338 |
|          | mel          | 900   | 213  |
|          | bkl          | 868   | 231  |
|          | bcc          | 418   | 96   |
|          | akiec        | 253   | 74   |
|          | vasc         | 118   | 24   |
|          | df           | 88    | 27   |
|          | <b>Total</b> | 8012  | 2003 |
| HEEL     | Normal       | 1473  | 369  |
|          | Heel Spur    | 1053  | 263  |
|          | Severe       | 638   | 160  |
|          | <b>Total</b> | 3164  | 792  |
| TN3K     | malignant    | 932   | 219  |
|          | benign       | 1723  | 331  |
|          | <b>Total</b> | 2655  | 544  |

$\tau_k$  throughout training. It operates in three regimes:

- When  $\tau_k < 0.60$ , a large step size  $\delta_k = 0.15$  is used to encourage rapid threshold progression, with  $P_k = 0.80$  and  $S_k = 0.20$ .
- When  $0.60 \leq \tau_k < 0.75$ , we moderate the update using  $\delta_k = 0.10$ ,  $P_k = 0.75$ , and  $S_k = 0.35$ .
- When  $\tau_k \geq 0.80$ , updates become conservative with  $\delta_k = 0.05$ ,  $P_k = 0.55$ , and  $S_k = 0.40$ .

This staged configuration allows the model to explore aggressively in early training while stabilizing and refining predictions in later stages, leading to more robust convergence behavior.

**Fixed-Aggressive.** This strategy uses fixed values across the entire training process, with a large step size  $\delta_k = 0.15$ , a relatively low performance percentile  $P_k = 0.60$ , and a small stability margin  $S_k = 0.40$ . The configuration encourages fast threshold updates with minimal stability constraints, favoring aggressive adaptation dynamics.

**Fixed-Moderate.** The moderate variant sets intermediate values:  $\delta_k = 0.10$ ,  $P_k = 0.70$ , and  $S_k = 0.25$ . It aims to balance adaptation speed and stability, representing a middle ground between aggressive and conservative strategies.

Table 6. Ablation of **piecewise decay** schedule parameters.

| Dataset        | $\delta_1$ | $\delta_2$ | $\beta_1$ | $\beta_2$ | A@0.5        |
|----------------|------------|------------|-----------|-----------|--------------|
| HAM (0.3–0.8)  | 0.10       | 0.05       | 0.55      | 0.70      | 92.23        |
|                | 0.15       | 0.10       | 0.55      | 0.75      | <b>94.26</b> |
|                | 0.20       | 0.15       | 0.60      | 0.75      | <u>93.97</u> |
|                | 0.25       | 0.20       | 0.60      | 0.75      | 93.10        |
| HEEL (0.3–0.8) | 0.10       | 0.05       | 0.50      | 0.70      | 93.38        |
|                | 0.15       | 0.10       | 0.50      | 0.75      | <b>94.19</b> |
|                | 0.20       | 0.15       | 0.60      | 0.75      | <u>94.11</u> |
|                | 0.25       | 0.20       | 0.60      | 0.75      | 93.87        |
| TN3K (0.3–0.8) | 0.10       | 0.05       | 0.50      | 0.70      | 65.97        |
|                | 0.15       | 0.10       | 0.50      | 0.75      | <u>66.18</u> |
|                | 0.20       | 0.15       | 0.60      | 0.75      | <b>66.31</b> |
|                | 0.25       | 0.20       | 0.60      | 0.75      | 65.56        |

**Fixed-Conservative.** This configuration employs a small step size  $\delta_k = 0.05$ , high performance requirement  $P_k = 0.80$ , and a tight stability margin  $S_k = 0.15$ . These constraints slow down the threshold adaptation process, ensuring greater caution and smoother updates throughout training.

All fixed strategies retain constant values for all three parameters, while the adaptive strategy transitions between configurations in a stage-wise manner depending on  $\tau_k$ . This dynamic scheduling is a key factor contributing to the superior performance of our method.

### C. More results on Piecewise Decay Schedule

To assess how the hyperparameters of the piecewise decay schedule influence RL-based localization, we perform an ablation over the stage-wise step sizes ( $\delta^{(1)}, \delta^{(2)}, \delta^{(3)}$ ) and the boundary thresholds ( $\beta^{(1)}, \beta^{(2)}$ ). In all settings, the adaptive IoU threshold is initialized at  $\tau_0=0.3$  and driven toward  $\tau_{\text{target}}=0.8$ , while the schedule parameters control *how fast and in what shape* this transition occurs. Our main results adopt the configuration  $\delta^{(1)}=0.15, \delta^{(2)}=0.10, \delta^{(3)}=0.05$  and  $\beta^{(1)}=0.55, \beta^{(2)}=0.75$ ; Table 6 reports additional piecewise configurations evaluated on HAM10000, HEEL, and TN3K. The default choice consistently achieves the best or near-best A@0.5, whereas both more aggressive and flatter step-size patterns lead to noticeable drops in performance. These results indicate that the schedule is not overly sensitive within a reasonable range, but benefits from *moderate early-stage increments followed by gentler late-stage refinement*, which provides a stable progression of  $\tau_k$  and alleviates reward sparsity during training.

### D. Additional baseline results

To provide a stronger empirical comparison, we additionally included three external baselines from recent literature.

Table 7. Additional baseline results (**left**) and main ablation study on group size G (**right**).

| Method           | HAM10000     | HEEL         | TN3K         | Group size | HAM10k       |
|------------------|--------------|--------------|--------------|------------|--------------|
| GroundingDINO-L  | 84.27        | 83.61        | 32.70        | 4          | 89.10        |
| BoxMed-RL        | <u>92.36</u> | 74.51        | <u>56.39</u> | 6          | 93.51        |
| MedGround-R1     | 88.23        | <u>89.52</u> | 51.43        | 8          | <b>94.46</b> |
| MedLoc-R1 (Ours) | <b>94.46</b> | <b>94.19</b> | <b>66.18</b> | 10         | 94.36        |

**GroundingDINO-L** [14] is a state-of-the-art open-set object detector, which we fine-tuned on our training set and used the highest-confidence predicted box as the final prediction. **BoxMed-RL** [10], originally developed for radiology report generation, adopts GRPO-based Spatially Verifiable Reinforcement (SVR) to align medical findings with bounding boxes on sentence-box aligned datasets. Its IoU-based reward, defined as IoU when  $\text{IoU} > 0$  and 0 otherwise, is effectively equivalent to our Raw-IoU baseline. We therefore reproduced its SVR framework in our bbox-only setting using instruction prompts of the form "Provide the bounding box for {target}." **MedGround-R1** [34] is a recent GRPO-based medical grounding method that combines spatial accuracy and semantic consistency in the reward design, together with a Chain-of-Box reasoning template. As shown in Table 7 (left), MedLoc-R1 consistently outperforms all three external baselines across the three datasets in terms of A@0.5, further validating the effectiveness of our performance-aware curriculum reward scheduling. In addition, Table 7 (right) reports a grid search over the key GRPO hyperparameter, namely the group size  $G$ .

### E. Failure Case Visualizations

We present several representative failure cases of MedLoc-R1 in Figure 8. Although the predicted bounding boxes are not always perfectly aligned with the ground truth, they are generally centered on the correct target regions, indicating that the model captures the key visual and semantic cues required for medical grounding.

On HEEL, MedLoc-R1 localizes the calcaneus region with good anatomical consistency. In failure cases, the predicted boxes may slightly under-cover or over-cover the annotated region, but they still focus on the correct bone structure while excluding most irrelevant areas. On TN3K, some predictions extend beyond the nodule boundary or miss subtle margins, yet the boxes remain centered on the relevant thyroid nodule region, suggesting that the model effectively exploits both spatial and intensity cues despite the ambiguity of ultrasound images. On HAM10000, although the predicted boxes may omit faint peripheral areas or include limited surrounding healthy skin, they generally cover the diagnostically important part of the lesion.

Overall, these examples suggest that the primary failure mode of MedLoc-R1 lies in spatial imprecision rather than incorrect target identification. Even when the localization is not exact, the model usually attends to the appropriate

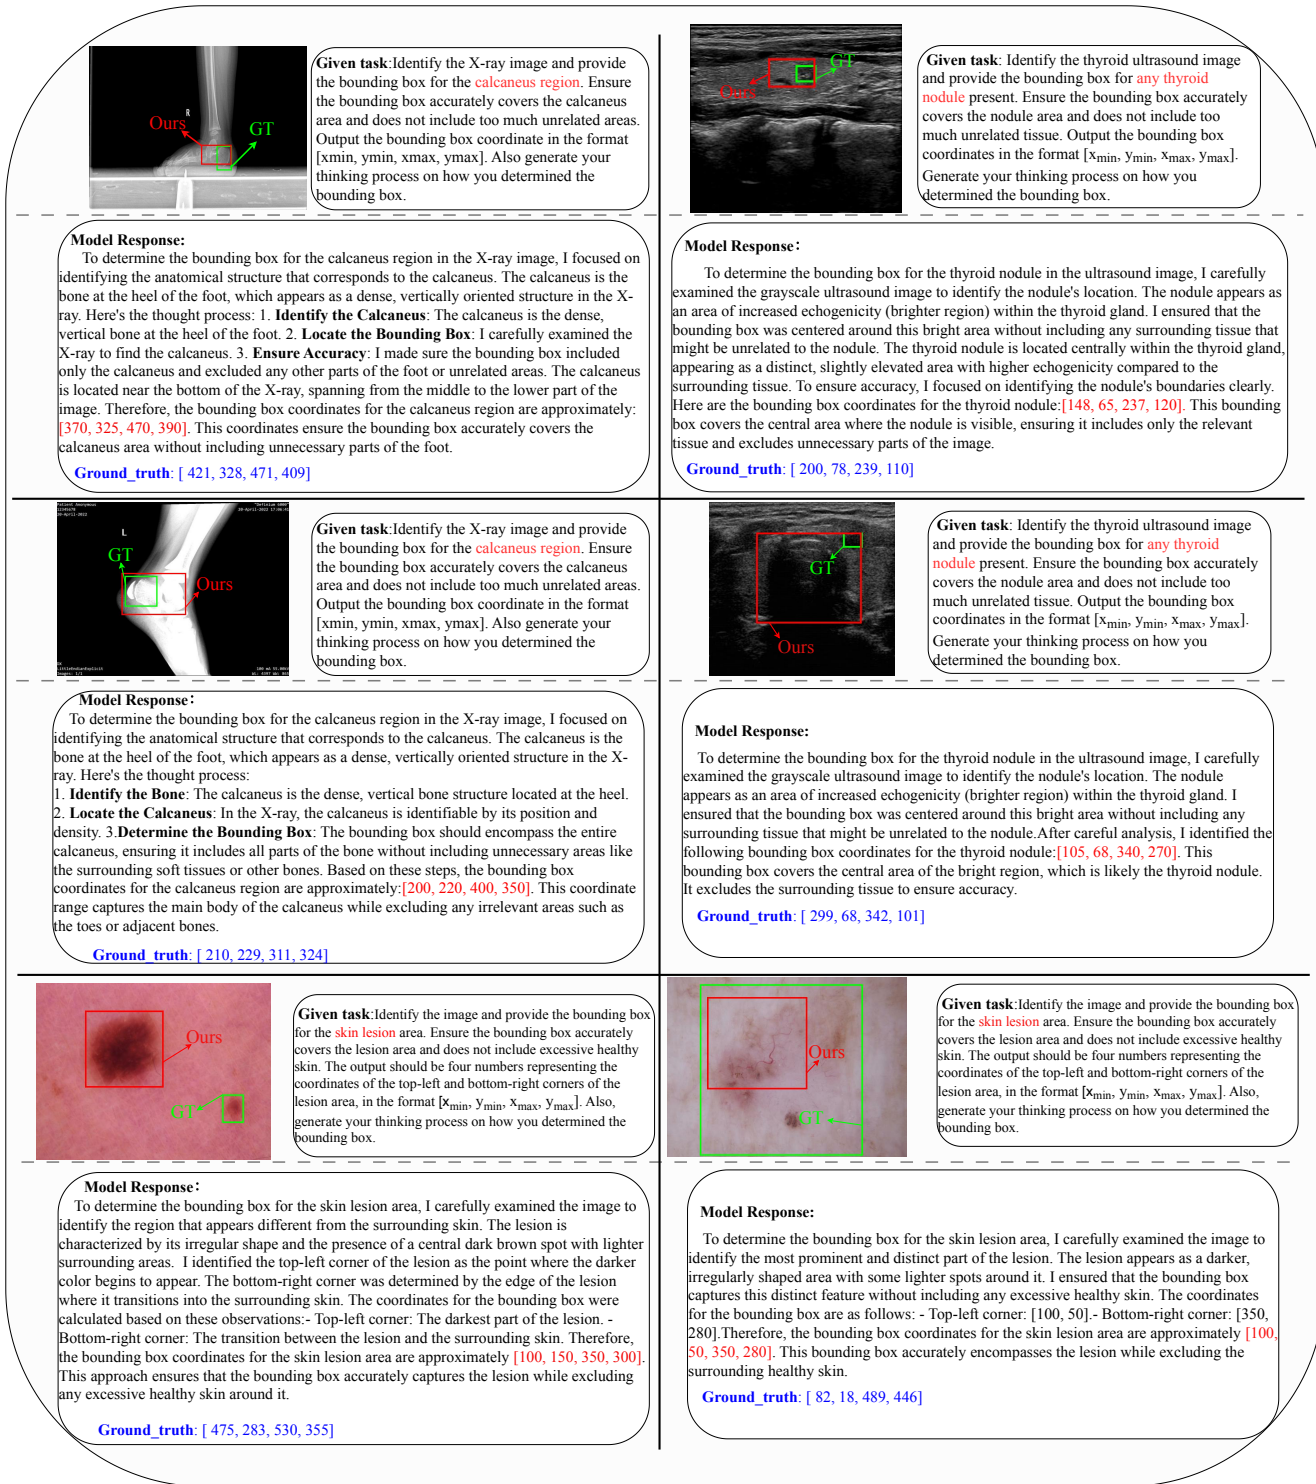

Figure 8. Visualization of representative failure cases from our method on the HEEL, TN3K, and HAM10000 datasets. Red boxes denote the predicted bounding boxes by our MedLoc-R1 method, while green boxes indicate the ground truth.

anatomical or pathological region, further supporting its effectiveness in medical visual grounding.
